# Supplementary material for: Genetic diversity of the enterohaemolysin gene (ehxA) in non-O157 Shiga toxin-producing Escherichia coli strains in China
Source: PubMed Central journal article supplement (PMC5844952; doi:10.1038/s41598-018-22699-7), 2018-03-09
Supplement: 41598_2018_22699_MOESM1_ESM.pdf [file 41598_2018_22699_MOESM1_ESM.pdf]

## **Supplementary Information**

### **Genetic diversity of the enterohaemolysin gene (*ehxA*) in non-O157 Shiga toxin-producing *Escherichia coli* strains in China**

**Shanshan Fu<sup>1</sup>, Xiangning Bai<sup>1</sup>, Ruyue Fan<sup>1</sup>, Hui Sun<sup>1</sup>, Yanmei Xu<sup>1</sup> and Yanwen Xiong<sup>1,2\*</sup>**

<sup>1</sup> State Key Laboratory of Infectious Disease Prevention and Control, National Institute for Communicable Disease Control and Prevention, Chinese Center for Disease Control and Prevention, Changping, Beijing, China

<sup>2</sup> Collaborative Innovation Center for Diagnosis and Treatment of Infectious Diseases, Hangzhou, Zhejiang Province, China

\* Corresponding author. Tel.: +8610 58900749; Fax: +8610 58900748

E-mail address: xiongyanwen@icdc.cn

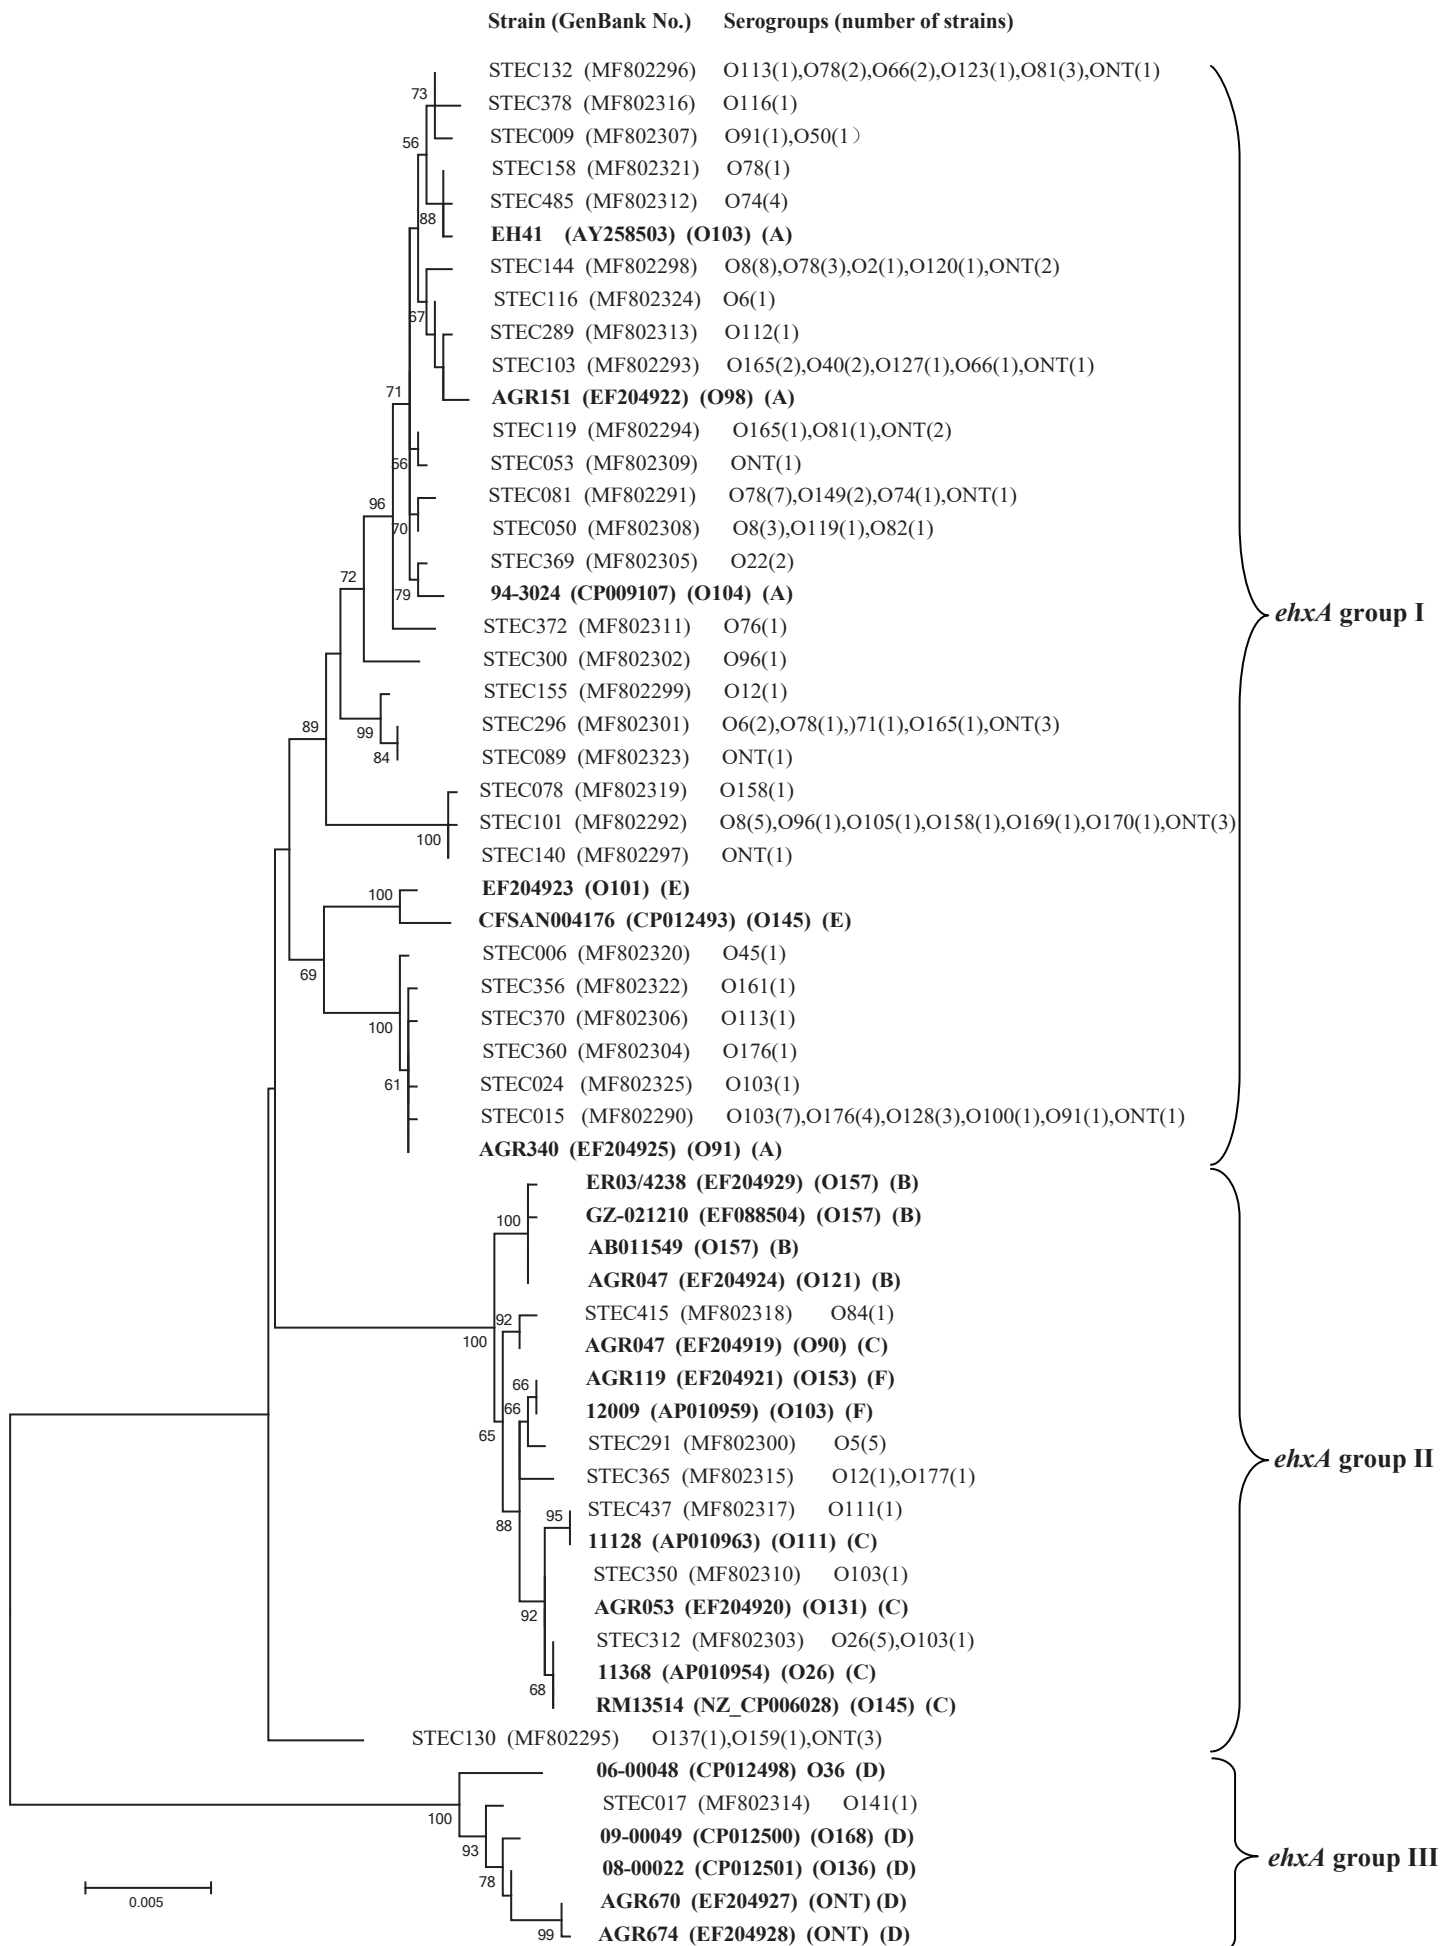

**Figure S1. Phylogenetic relationships of *ehxA* sequences based on the maximum-likelihood method.**

Thirty-six unique *ehxA* sequences were obtained in this study. The serogroups for each *ehxA* genotype (representative strain) are given. Twenty-two sequences of six *ehxA* PCR-RFLP subtypes A to F downloaded from GenBank are indicated in bold. Bootstrap values > 50% are shown at the branch points.

**Table S1. Characteristics of 434 non-O157 STEC strains used in this study**

| Strain | Origin            | Location     | Year | O serogroup | H type | Virulence genes |              |            |             |
|--------|-------------------|--------------|------|-------------|--------|-----------------|--------------|------------|-------------|
|        |                   |              |      |             |        | <i>stx1</i>     | <i>stx2</i>  | <i>eae</i> | <i>ehxA</i> |
| ST003  | Goat              | Henan        | 2009 | O45         | H2     | <i>stx1c</i>    | <i>stx2d</i> | -          | -           |
| ST004  | Goat              | Henan        | 2009 | O118        | H16    | -               | <i>stx2d</i> | -          | -           |
| ST005  | Goat              | Henan        | 2009 | O39         | H19    | -               | <i>stx2e</i> | -          | -           |
| ST006  | Goat              | Henan        | 2009 | O45         | H2     | <i>stx1c</i>    | <i>stx2d</i> | -          | +           |
| ST007  | Goat              | Henan        | 2009 | O91         | H14    | <i>stx1c</i>    | <i>stx2d</i> | -          | +           |
| ST008  | Goat              | Henan        | 2009 | O21         | H25    | -               | <i>stx2d</i> | -          | -           |
| ST009  | Goat              | Henan        | 2009 | O91         | H14    | <i>stx1c</i>    | <i>stx2d</i> | -          | +           |
| ST010  | Goat              | Henan        | 2009 | O110        | H16    | <i>stx1a</i>    | <i>stx2d</i> | -          | -           |
| ST011  | Goat              | Henan        | 2009 | O103        | H8     | <i>stx1c</i>    | -            | -          | +           |
| ST012  | Goat              | Henan        | 2009 | O21         | H25    | <i>stx1a</i>    | -            | -          | -           |
| ST013  | Goat              | Henan        | 2009 | O21         | H25    | <i>stx1a</i>    | -            | -          | -           |
| ST014  | Goat              | Henan        | 2009 | O21         | H25    | <i>stx1a</i>    | -            | -          | -           |
| ST015  | Goat              | Henan        | 2009 | O103        | H8     | <i>stx1c</i>    | -            | -          | +           |
| ST016  | Goat              | Henan        | 2009 | O103        | H8     | <i>stx1c</i>    | -            | -          | +           |
| ST017  | Goat              | Henan        | 2009 | O141ac      | H25    | -               | <i>stx2g</i> | -          | +           |
| ST018  | Goat              | Henan        | 2009 | O15         | H21    | <i>stx1a</i>    | -            | -          | -           |
| ST019  | Goat              | Henan        | 2009 | O12         | H21    | <i>stx1a</i>    | -            | -          | -           |
| ST020  | Goat              | Henan        | 2009 | O12         | H21    | <i>stx1a</i>    | -            | -          | -           |
| ST021  | Goat              | Henan        | 2009 | O21         | H25    | <i>stx1a</i>    | -            | -          | -           |
| ST022  | Goat              | Henan        | 2009 | O21         | H25    | <i>stx1a</i>    | -            | -          | -           |
| ST023  | Goat              | Henan        | 2009 | O103        | H8     | <i>stx1c</i>    | -            | -          | +           |
| ST024  | Goat              | Henan        | 2009 | O103        | H8     | <i>stx1c</i>    | -            | -          | +           |
| ST025  | Goat              | Henan        | 2009 | O103        | H8     | <i>stx1c</i>    | -            | -          | +           |
| ST026  | Goat              | Henan        | 2009 | O103        | H8     | <i>stx1c</i>    | -            | -          | +           |
| ST027  | Goat              | Henan        | 2009 | O103        | H8     | <i>stx1c</i>    | -            | -          | +           |
| ST028  | Goat              | Henan        | 2009 | OUT         | H21    | <i>stx1c</i>    | -            | -          | -           |
| ST029  | Goat              | Henan        | 2009 | O15         | H21    | <i>stx1c</i>    | -            | -          | -           |
| ST030  | Goat              | Henan        | 2009 | OUT         | H21    | <i>stx1a</i>    | -            | -          | -           |
| ST031  | Diarrheal patient | Henan        | 2011 | O107        | H7     | <i>stx1a</i>    | -            | -          | -           |
| ST032  | Diarrheal patient | Henan        | 2011 | O107        | H7     | <i>stx1a</i>    | -            | -          | -           |
| ST033  | Beef cattle       | Heilongjiang | 2009 | O113        | H19    | <i>stx1a</i>    | <i>stx2a</i> | -          | +           |
| ST036  | Yak               | Qinghai      | 2012 | NT          | H21    | -               | <i>stx2d</i> | -          | +           |
| ST037  | Yak               | Qinghai      | 2012 | NT          | H44    | <i>stx1a</i>    | -            | -          | +           |
| ST038  | Yak               | Qinghai      | 2012 | O8          | H9     | <i>stx1a</i>    | <i>stx2d</i> | -          | +           |
| ST039  | Yak               | Qinghai      | 2012 | NT          | H7     | <i>stx1a</i>    | -            | -          | +           |
| ST040  | Yak               | Qinghai      | 2012 | O6          | H21    | <i>stx1a</i>    | -            | -          | +           |
| ST041  | Yak               | Qinghai      | 2012 | O6          | H21    | <i>stx1a</i>    | -            | -          | -           |

|         |     |         |      |         |     |              |                    |   |   |
|---------|-----|---------|------|---------|-----|--------------|--------------------|---|---|
| ST042   | Yak | Qinghai | 2012 | O78     | H45 | -            | <i>stx2g</i>       | - | + |
| ST043   | Yak | Qinghai | 2012 | O8      | H9  | <i>stx1a</i> | <i>stx2d</i>       | - | + |
| ST044   | Yak | Qinghai | 2012 | O8      | H16 | -            | <i>stx2b</i>       | - | - |
| ST045   | Yak | Qinghai | 2012 | O8      | H9  | <i>stx1a</i> | <i>stx2d</i>       | - | + |
| ST046   | Yak | Qinghai | 2012 | O6      | NT  | <i>stx1a</i> | -                  | - | + |
| ST047-1 | Yak | Qinghai | 2012 | O165    | H21 | <i>stx1a</i> | -                  | - | + |
| ST047-2 | Yak | Qinghai | 2012 | O78     | H45 | -            | <i>stx2g</i>       | - | - |
| ST048   | Yak | Qinghai | 2012 | O78     | H45 | -            | <i>stx2g</i>       | - | - |
| ST049   | Yak | Qinghai | 2012 | NT      | NT  | -            | <i>stx2c</i>       | - | + |
| ST050   | Yak | Qinghai | 2012 | O8      | H19 | <i>stx1a</i> | -                  | - | + |
| ST051   | Yak | Qinghai | 2012 | NT      | H21 | <i>stx1a</i> | -                  | - | + |
| ST052   | Yak | Qinghai | 2012 | NT      | H21 | <i>stx1a</i> | -                  | - | + |
| ST053   | Yak | Qinghai | 2012 | NT      | NT  | <i>stx1a</i> | <i>stx2a+stx2b</i> | - | + |
| ST054   | Yak | Qinghai | 2012 | NT      | H8  | <i>stx1a</i> | <i>stx2a+stx2b</i> | - | + |
| ST055   | Yak | Qinghai | 2012 | O66     | H8  | <i>stx1a</i> | -                  | - | + |
| ST056   | Yak | Qinghai | 2012 | O78     | NT  | -            | <i>stx2a</i>       | + | + |
| ST057   | Yak | Qinghai | 2012 | O78     | H21 | -            | <i>stx2c</i>       | - | + |
| ST058   | Yak | Qinghai | 2012 | O22     | H8  | -            | <i>stx2b</i>       | - | - |
| ST059   | Yak | Qinghai | 2012 | O12/O78 | H44 | -            | <i>stx2d</i>       | - | - |
| ST060   | Yak | Qinghai | 2012 | O117    | H21 | -            | <i>stx2b</i>       | - | - |
| ST061   | Yak | Qinghai | 2012 | O78     | H45 | -            | <i>stx2g</i>       | - | - |
| ST062   | Yak | Qinghai | 2012 | O8      | H45 | -            | <i>stx2g</i>       | - | - |
| ST063   | Yak | Qinghai | 2012 | O8      | H19 | <i>stx1a</i> | -                  | - | + |
| ST064   | Yak | Qinghai | 2012 | O8      | H19 | <i>stx1a</i> | -                  | - | + |
| ST065   | Yak | Qinghai | 2012 | O8      | H9  | <i>stx1a</i> | <i>stx2d</i>       | - | + |
| ST066   | Yak | Qinghai | 2012 | O8      | H9  | <i>stx1a</i> | <i>stx2d</i>       | - | + |
| ST067   | Yak | Qinghai | 2012 | O8      | H16 | -            | <i>stx2b</i>       | - | - |
| ST068   | Yak | Qinghai | 2012 | O78     | H21 | -            | <i>stx2a</i>       | + | + |
| ST069   | Yak | Qinghai | 2012 | O52     | H2  | -            | <i>stx2b</i>       | - | - |
| ST070   | Yak | Qinghai | 2012 | O78     | H45 | -            | <i>stx2g</i>       | - | - |
| ST071   | Yak | Qinghai | 2012 | O8      | H9  | <i>stx1a</i> | <i>stx2d</i>       | - | + |
| ST072   | Yak | Qinghai | 2012 | O8      | H9  | <i>stx1a</i> | <i>stx2d</i>       | - | + |
| ST073   | Yak | Qinghai | 2012 | O8      | H9  | <i>stx1a</i> | <i>stx2d</i>       | - | + |
| ST074   | Yak | Qinghai | 2012 | O117    | H21 | -            | <i>stx2b</i>       | - | - |
| ST075   | Yak | Qinghai | 2012 | O66     | H21 | -            | <i>stx2a+stx2b</i> | - | + |
| ST076   | Yak | Qinghai | 2012 | NT      | H8  | -            | <i>stx2b</i>       | - | + |
| ST077   | Yak | Qinghai | 2012 | O158    | H8  | -            | <i>stx2b</i>       | - | + |
| ST078   | Yak | Qinghai | 2012 | O158    | H8  | -            | <i>stx2b</i>       | - | + |
| ST079   | Yak | Qinghai | 2012 | O2      | H45 | <i>stx1a</i> | -                  | - | - |
| ST080   | Yak | Qinghai | 2012 | O2      | H45 | <i>stx1a</i> | -                  | - | - |
| ST081   | Yak | Qinghai | 2012 | O78     | H8  | -            | <i>stx2a</i>       | - | + |
| ST082   | Yak | Qinghai | 2012 | O78     | H8  | -            | <i>stx2a</i>       | - | + |
| ST083   | Yak | Qinghai | 2012 | O2      | H45 | <i>stx1a</i> | -                  | - | - |

|       |     |         |      |      |     |              |                    |   |   |
|-------|-----|---------|------|------|-----|--------------|--------------------|---|---|
| ST084 | Yak | Qinghai | 2012 | O66  | H21 | -            | <i>stx2a+stx2b</i> | - | + |
| ST085 | Yak | Qinghai | 2012 | O8   | H16 | -            | <i>stx2b</i>       | - | - |
| ST086 | Yak | Qinghai | 2012 | O8   | H45 | -            | <i>stx2b</i>       | - | - |
| ST087 | Yak | Qinghai | 2012 | O8   | H45 | -            | <i>stx2b</i>       | - | - |
| ST088 | Yak | Qinghai | 2012 | O22  | H8  | -            | <i>stx2b</i>       | - | - |
| ST089 | Yak | Qinghai | 2012 | NT   | H21 | <i>stx1a</i> | -                  | - | + |
| ST090 | Yak | Qinghai | 2012 | O22  | H8  | -            | <i>stx2b</i>       | - | - |
| ST091 | Yak | Qinghai | 2012 | NT   | H21 | <i>stx1a</i> | -                  | - | + |
| ST092 | Yak | Qinghai | 2012 | NT   | H8  | -            | <i>stx2b</i>       | - | + |
| ST093 | Yak | Qinghai | 2012 | O2   | H45 | <i>stx1a</i> | -                  | - | - |
| ST094 | Yak | Qinghai | 2012 | O137 | H21 | <i>stx1a</i> | <i>stx2a</i>       | - | + |
| ST095 | Yak | Qinghai | 2012 | NT   | H8  | <i>stx1a</i> | -                  | - | + |
| ST096 | Yak | Qinghai | 2012 | O127 | H8  | <i>stx1a</i> | <i>stx2d</i>       | - | + |
| ST097 | Yak | Qinghai | 2012 | O2   | H45 | <i>stx1a</i> | -                  | - | - |
| ST098 | Yak | Qinghai | 2012 | O117 | H21 | -            | <i>stx2b</i>       | - | - |
| ST099 | Yak | Qinghai | 2012 | O117 | H21 | -            | <i>stx2b</i>       | - | - |
| ST100 | Yak | Qinghai | 2012 | NT   | H8  | <i>stx1a</i> | <i>stx2b</i>       | - | + |
| ST101 | Yak | Qinghai | 2012 | O8   | H2  | -            | <i>stx2d</i>       | - | + |
| ST102 | Yak | Qinghai | 2012 | O165 | H8  | <i>stx1a</i> | -                  | - | + |
| ST103 | Yak | Qinghai | 2012 | O165 | H8  | <i>stx1a</i> | -                  | - | + |
| ST104 | Yak | Qinghai | 2012 | O8   | H16 | -            | <i>stx2b</i>       | - | - |
| ST105 | Yak | Qinghai | 2012 | O8   | H16 | -            | <i>stx2b</i>       | - | - |
| ST106 | Yak | Qinghai | 2012 | O117 | H2  | -            | <i>stx2b</i>       | - | - |
| ST107 | Yak | Qinghai | 2012 | O117 | H2  | -            | <i>stx2b</i>       | - | - |
| ST108 | Yak | Qinghai | 2012 | O117 | H2  | -            | <i>stx2b</i>       | - | - |
| ST109 | Yak | Qinghai | 2012 | O117 | H2  | -            | <i>stx2b</i>       | - | - |
| ST110 | Yak | Qinghai | 2012 | O8   | H16 | -            | <i>stx2b</i>       | - | - |
| ST111 | Yak | Qinghai | 2012 | O8   | H16 | -            | <i>stx2b</i>       | - | - |
| ST112 | Yak | Qinghai | 2012 | O117 | H21 | -            | <i>stx2b</i>       | - | - |
| ST113 | Yak | Qinghai | 2012 | O117 | H21 | -            | <i>stx2b</i>       | - | - |
| ST114 | Yak | Qinghai | 2012 | O117 | H21 | -            | <i>stx2b</i>       | - | - |
| ST115 | Yak | Qinghai | 2012 | O6   | H14 | -            | <i>stx2b</i>       | - | + |
| ST116 | Yak | Qinghai | 2012 | O6   | H14 | -            | <i>stx2b</i>       | - | + |
| ST117 | Yak | Qinghai | 2012 | O158 | H16 | -            | <i>stx2b</i>       | - | - |
| ST118 | Yak | Qinghai | 2012 | O8   | H16 | -            | <i>stx2b</i>       | - | - |
| ST119 | Yak | Qinghai | 2012 | NT   | H8  | <i>stx1a</i> | <i>stx2d</i>       | - | + |
| ST120 | Yak | Qinghai | 2012 | O165 | H8  | <i>stx1a</i> | <i>stx2d</i>       | - | + |
| ST121 | Yak | Qinghai | 2012 | O117 | H21 | -            | <i>stx2b</i>       | - | - |
| ST122 | Yak | Qinghai | 2012 | NT   | H40 | -            | <i>stx2b</i>       | - | - |
| ST123 | Yak | Qinghai | 2012 | O117 | H21 | -            | <i>stx2b</i>       | - | - |
| ST124 | Yak | Qinghai | 2012 | O117 | H21 | -            | <i>stx2b</i>       | - | - |
| ST125 | Yak | Qinghai | 2012 | O8   | H16 | -            | <i>stx2b</i>       | - | - |
| ST126 | Yak | Qinghai | 2012 | O117 | H21 | -            | <i>stx2b</i>       | - | - |

|       |     |           |      |      |     |              |                 |   |   |
|-------|-----|-----------|------|------|-----|--------------|-----------------|---|---|
| ST127 | Yak | Qinghai   | 2012 | O78  | H8  | <i>stx1a</i> | <i>stx2d</i>    | - | + |
| ST128 | Yak | Qinghai   | 2012 | O78  | H8  | <i>stx1a</i> | <i>stx2d</i>    | - | + |
| ST129 | Yak | Qinghai   | 2012 | NT   | H21 | <i>stx1a</i> | <i>stx2d</i>    | - | + |
| ST130 | Yak | Qinghai   | 2012 | NT   | H21 | <i>stx1a</i> | <i>stx2d</i>    | - | + |
| ST131 | Yak | Qinghai   | 2012 | NT   | H44 | <i>stx1a</i> | -               | - | + |
| ST132 | Yak | Qinghai   | 2012 | O123 | H8  | <i>stx1a</i> | <i>stx2b</i>    | - | + |
| ST133 | Yak | Qinghai   | 2012 | O8   | H16 | -            | <i>stx2b</i>    | - | - |
| ST134 | Yak | Qinghai   | 2012 | O8   | H16 | -            | <i>stx2b</i>    | - | - |
| ST135 | Yak | Qinghai   | 2012 | O8   | H16 | -            | <i>stx2b</i>    | - | - |
| ST136 | Yak | Qinghai   | 2012 | O8   | H16 | -            | <i>stx2b</i>    | - | - |
| ST137 | Yak | Qinghai   | 2012 | O8   | H16 | -            | <i>stx2b</i>    | - | - |
| ST138 | Yak | Qinghai   | 2012 | O149 | H45 | -            | <i>stx2d</i>    | - | + |
| ST139 | Yak | Qinghai   | 2012 | O149 | H45 | -            | <i>stx2d</i>    | - | + |
| ST140 | Yak | Qinghai   | 2012 | NT   | H8  | -            | <i>stx2a</i>    | - | + |
| ST141 | Yak | Qinghai   | 2012 | NT   | H8  | -            | <i>stx2a</i>    | - | + |
| ST142 | Yak | Qinghai   | 2012 | O2   | H45 | <i>stx1a</i> | -               | - | - |
| ST143 | Yak | Qinghai   | 2012 | O2   | H45 | <i>stx1a</i> | -               | - | - |
| ST144 | Yak | Qinghai   | 2012 | O78  | H45 | -            | <i>stx2a+2c</i> | - | + |
| ST145 | Yak | Qinghai   | 2012 | O78  | H21 | -            | <i>stx2a+2c</i> | - | + |
| ST146 | Yak | Qinghai   | 2012 | O2   | H21 | -            | <i>stx2a+2c</i> | - | + |
| ST147 | Yak | Qinghai   | 2012 | O2   | H45 | <i>stx1a</i> | -               | - | - |
| ST148 | Yak | Qinghai   | 2012 | O22  | H8  | -            | <i>stx2b</i>    | - | - |
| ST149 | Yak | Qinghai   | 2012 | O2   | H45 | <i>stx1a</i> | -               | - | - |
| ST150 | Yak | Qinghai   | 2012 | O2   | H45 | <i>stx1a</i> | -               | - | - |
| ST151 | Yak | Qinghai   | 2012 | O2   | H45 | <i>stx1a</i> | -               | - | - |
| ST152 | Yak | Qinghai   | 2012 | O78  | H8  | -            | <i>stx2a</i>    | - | + |
| ST153 | Yak | Qinghai   | 2012 | O78  | H8  | -            | <i>stx2a</i>    | - | + |
| ST154 | Yak | Qinghai   | 2012 | O78  | H44 | -            | <i>stx2d</i>    | - | - |
| ST155 | Yak | Qinghai   | 2012 | O12  | H12 | <i>stx1a</i> | -               | - | + |
| ST156 | Yak | Qinghai   | 2012 | O78  | H8  | -            | <i>stx2a</i>    | - | + |
| ST157 | Yak | Qinghai   | 2012 | O2   | H45 | <i>stx1a</i> | -               | - | - |
| ST158 | Yak | Qinghai   | 2012 | O78  | H8  | -            | <i>stx2a+2c</i> | - | + |
| ST159 | Yak | Qinghai   | 2012 | O2   | H45 | <i>stx1a</i> | -               | - | - |
| ST160 | Yak | Qinghai   | 2012 | O2   | H45 | <i>stx1a</i> | -               | - | - |
| ST161 | Yak | Qinghai   | 2012 | O52  | H2  | -            | <i>stx2b</i>    | - | - |
| ST162 | Yak | Qinghai   | 2012 | O52  | H2  | -            | <i>stx2b</i>    | - | - |
| ST163 | Pig | Chongqing | 2012 | O2   | H32 | -            | <i>stx2e</i>    | - | - |
| ST164 | Pig | Chongqing | 2012 | O2   | H32 | -            | <i>stx2e</i>    | - | - |
| ST165 | Pig | Chongqing | 2012 | O2   | H32 | -            | <i>stx2e</i>    | - | - |
| ST166 | Pig | Chongqing | 2012 | O2   | H32 | -            | <i>stx2e</i>    | - | - |
| ST167 | Pig | Chongqing | 2012 | O2   | H32 | -            | <i>stx2e</i>    | - | - |
| ST168 | Pig | Chongqing | 2012 | O2   | H32 | -            | <i>stx2e</i>    | - | - |
| ST169 | Pig | Chongqing | 2012 | O2   | H32 | -            | <i>stx2e</i>    | - | - |

|       |     |           |      |      |     |   |              |   |   |
|-------|-----|-----------|------|------|-----|---|--------------|---|---|
| ST170 | Pig | Chongqing | 2012 | O2   | H32 | - | <i>stx2e</i> | - | - |
| ST171 | Pig | Chongqing | 2012 | O116 | H11 | - | <i>stx2e</i> | - | - |
| ST172 | Pig | Chongqing | 2012 | O2   | H32 | - | <i>stx2e</i> | - | - |
| ST173 | Pig | Chongqing | 2012 | O20  | H30 | - | <i>stx2e</i> | - | - |
| ST174 | Pig | Chongqing | 2012 | O20  | H26 | - | <i>stx2e</i> | - | - |
| ST175 | Pig | Chongqing | 2012 | O20  | H30 | - | <i>stx2e</i> | - | - |
| ST176 | Pig | Chongqing | 2012 | O76  | H25 | - | <i>stx2e</i> | - | - |
| ST177 | Pig | Chongqing | 2012 | O20  | H26 | - | <i>stx2e</i> | - | - |
| ST178 | Pig | Chongqing | 2012 | O20  | H30 | - | <i>stx2e</i> | - | - |
| ST179 | Pig | Chongqing | 2012 | O20  | H30 | - | <i>stx2e</i> | - | - |
| ST180 | Pig | Chongqing | 2012 | ONT  | H30 | - | <i>stx2e</i> | - | - |
| ST181 | Pig | Chongqing | 2012 | ONT  | H30 | - | <i>stx2e</i> | - | - |
| ST182 | Pig | Chongqing | 2012 | O114 | H30 | - | <i>stx2e</i> | - | - |
| ST183 | Pig | Chongqing | 2012 | O65  | H30 | - | <i>stx2e</i> | - | - |
| ST184 | Pig | Chongqing | 2012 | O100 | H20 | - | <i>stx2e</i> | - | - |
| ST185 | Pig | Chongqing | 2012 | O100 | H20 | - | <i>stx2e</i> | - | - |
| ST186 | Pig | Chongqing | 2012 | O20  | H30 | - | <i>stx2e</i> | - | - |
| ST187 | Pig | Chongqing | 2012 | O20  | H30 | - | <i>stx2e</i> | - | - |
| ST188 | Pig | Beijing   | 2012 | ONT  | H21 | - | <i>stx2e</i> | - | - |
| ST189 | Pig | Beijing   | 2012 | ONT  | H21 | - | <i>stx2e</i> | - | - |
| ST190 | Pig | Beijing   | 2012 | ONT  | H33 | - | <i>stx2e</i> | - | - |
| ST191 | Pig | Beijing   | 2012 | ONT  | H30 | - | <i>stx2e</i> | - | - |
| ST192 | Pig | Beijing   | 2012 | O2   | H32 | - | <i>stx2e</i> | - | - |
| ST193 | Pig | Beijing   | 2012 | O2   | H32 | - | <i>stx2e</i> | - | - |
| ST194 | Pig | Beijing   | 2012 | ONT  | H30 | - | <i>stx2e</i> | - | - |
| ST195 | Pig | Beijing   | 2012 | ONT  | H30 | - | <i>stx2e</i> | - | - |
| ST196 | Pig | Beijing   | 2012 | O2   | H30 | - | <i>stx2e</i> | - | - |
| ST197 | Pig | Beijing   | 2012 | O172 | H30 | - | <i>stx2e</i> | - | - |
| ST198 | Pig | Beijing   | 2012 | O172 | H30 | - | <i>stx2e</i> | - | - |
| ST199 | Pig | Beijing   | 2012 | O20  | H30 | - | <i>stx2e</i> | - | - |
| ST200 | Pig | Beijing   | 2012 | O20  | H30 | - | <i>stx2e</i> | - | - |
| ST201 | Pig | Beijing   | 2012 | O20  | H30 | - | <i>stx2e</i> | - | - |
| ST202 | Pig | Beijing   | 2012 | O20  | H30 | - | <i>stx2e</i> | - | - |
| ST203 | Pig | Beijing   | 2012 | ONT  | H30 | - | <i>stx2e</i> | - | - |
| ST204 | Pig | Beijing   | 2012 | O20  | H30 | - | <i>stx2e</i> | - | - |
| ST205 | Pig | Beijing   | 2012 | O20  | H30 | - | <i>stx2e</i> | - | - |
| ST206 | Pig | Beijing   | 2012 | O20  | H30 | - | <i>stx2e</i> | - | - |
| ST207 | Pig | Beijing   | 2012 | O20  | H30 | - | <i>stx2e</i> | - | - |
| ST208 | Pig | Beijing   | 2012 | ONT  | H30 | - | <i>stx2e</i> | - | - |
| ST209 | Pig | Beijing   | 2012 | ONT  | H30 | - | <i>stx2e</i> | - | - |
| ST210 | Pig | Beijing   | 2012 | O7   | H30 | - | <i>stx2e</i> | - | - |
| ST211 | Pig | Beijing   | 2012 | ONT  | H19 | - | <i>stx2e</i> | - | - |
| ST212 | Pig | Beijing   | 2012 | ONT  | H19 | - | <i>stx2e</i> | - | - |

|       |     |         |      |         |     |   |              |   |   |
|-------|-----|---------|------|---------|-----|---|--------------|---|---|
| ST213 | Pig | Beijing | 2012 | ONT     | H19 | - | <i>stx2e</i> | - | - |
| ST214 | Pig | Beijing | 2012 | O100    | H30 | - | <i>stx2e</i> | - | - |
| ST215 | Pig | Beijing | 2012 | O20     | H30 | - | <i>stx2e</i> | - | - |
| ST216 | Pig | Beijing | 2012 | O20     | H30 | - | <i>stx2e</i> | - | - |
| ST217 | Pig | Beijing | 2012 | O20     | H30 | - | <i>stx2e</i> | - | - |
| ST218 | Pig | Beijing | 2012 | O20     | H30 | - | <i>stx2e</i> | - | - |
| ST219 | Pig | Beijing | 2012 | O114    | H30 | - | <i>stx2e</i> | - | - |
| ST220 | Pig | Beijing | 2012 | O7      | H42 | - | <i>stx2e</i> | - | - |
| ST221 | Pig | Beijing | 2012 | O172    | H30 | - | <i>stx2e</i> | - | - |
| ST222 | Pig | Beijing | 2012 | ONT     | H30 | - | <i>stx2e</i> | - | - |
| ST223 | Pig | Beijing | 2012 | ONT     | H30 | - | <i>stx2e</i> | - | - |
| ST224 | Pig | Beijing | 2012 | ONT     | H30 | - | <i>stx2e</i> | - | - |
| ST225 | Pig | Beijing | 2012 | ONT     | H30 | - | <i>stx2e</i> | - | - |
| ST226 | Pig | Beijing | 2012 | ONT     | H30 | - | <i>stx2e</i> | - | - |
| ST227 | Pig | Beijing | 2012 | ONT     | H30 | - | <i>stx2e</i> | - | - |
| ST228 | Pig | Beijing | 2012 | ONT     | H30 | - | <i>stx2e</i> | - | - |
| ST229 | Pig | Beijing | 2012 | ONT     | H20 | - | <i>stx2e</i> | - | - |
| ST230 | Pig | Beijing | 2012 | ONT     | H20 | - | <i>stx2e</i> | + | - |
| ST231 | Pig | Beijing | 2012 | ONT     | ONT | - | <i>stx2e</i> | - | - |
| ST232 | Pig | Beijing | 2012 | ONT     | H20 | - | <i>stx2e</i> | - | - |
| ST233 | Pig | Beijing | 2012 | O65     | H30 | - | <i>stx2e</i> | - | - |
| ST234 | Pig | Beijing | 2012 | O142    | H27 | - | <i>stx2e</i> | - | - |
| ST235 | Pig | Beijing | 2012 | O86     | H11 | - | <i>stx2e</i> | - | - |
| ST236 | Pig | Beijing | 2012 | ONT     | H30 | - | <i>stx2e</i> | - | - |
| ST237 | Pig | Beijing | 2012 | O20     | H30 | - | <i>stx2e</i> | - | - |
| ST238 | Pig | Beijing | 2012 | O9      | H30 | - | <i>stx2e</i> | - | - |
| ST239 | Pig | Beijing | 2012 | ONT     | H30 | - | <i>stx2e</i> | - | - |
| ST240 | Pig | Beijing | 2012 | O143    | H38 | - | <i>stx2e</i> | - | - |
| ST241 | Pig | Beijing | 2012 | O143    | H38 | - | <i>stx2e</i> | - | - |
| ST242 | Pig | Beijing | 2012 | ONT     | H17 | - | <i>stx2e</i> | - | - |
| ST243 | Pig | Beijing | 2012 | ONT     | H17 | - | <i>stx2e</i> | - | - |
| ST244 | Pig | Beijing | 2012 | O5(O70) | H30 | - | <i>stx2e</i> | - | - |
| ST245 | Pig | Beijing | 2012 | O5(O70) | H30 | - | <i>stx2e</i> | + | - |
| ST246 | Pig | Beijing | 2012 | O65     | H30 | - | <i>stx2e</i> | - | - |
| ST247 | Pig | Beijing | 2012 | O20     | H30 | - | <i>stx2e</i> | - | - |
| ST248 | Pig | Beijing | 2012 | ONT     | H30 | - | <i>stx2e</i> | - | - |
| ST249 | Pig | Beijing | 2012 | ONT     | H30 | - | <i>stx2e</i> | - | - |
| ST250 | Pig | Beijing | 2012 | O20     | H30 | - | <i>stx2e</i> | - | - |
| ST251 | Pig | Beijing | 2012 | ONT     | H30 | - | <i>stx2e</i> | - | - |
| ST252 | Pig | Beijing | 2012 | O9      | H30 | - | <i>stx2e</i> | - | - |
| ST253 | Pig | Beijing | 2012 | O100    | H30 | - | <i>stx2e</i> | - | - |
| ST254 | Pig | Beijing | 2012 | O5(O70) | H30 | - | <i>stx2e</i> | - | - |
| ST255 | Pig | Beijing | 2012 | O86     | H11 | - | <i>stx2e</i> | - | - |



|       |                    |              |      |          |     |              |              |   |   |
|-------|--------------------|--------------|------|----------|-----|--------------|--------------|---|---|
| ST256 | Pig                | Beijing      | 2012 | O9       | H30 | -            | <i>stx2e</i> | - | - |
| ST257 | Pig                | Beijing      | 2012 | O9       | H30 | -            | <i>stx2e</i> | - | - |
| ST258 | Pig                | Beijing      | 2012 | O20      | H30 | -            | <i>stx2e</i> | - | - |
| ST259 | Pig                | Beijing      | 2012 | O71      | H30 | -            | <i>stx2e</i> | - | - |
| ST260 | Pig                | Beijing      | 2012 | O116     | H30 | -            | <i>stx2e</i> | - | - |
| ST261 | Pig                | Beijing      | 2012 | O65      | H30 | -            | <i>stx2e</i> | - | - |
| ST262 | Pig                | Beijing      | 2012 | O65      | H30 | -            | <i>stx2e</i> | - | - |
| ST263 | Pig                | Beijing      | 2012 | O65      | H30 | -            | <i>stx2e</i> | - | - |
| ST264 | Pig                | Beijing      | 2012 | ONT      | H30 | -            | <i>stx2e</i> | - | - |
| ST265 | Pig                | Beijing      | 2012 | O100     | H30 | -            | <i>stx2e</i> | - | - |
| ST266 | Pig                | Beijing      | 2012 | O143     | H38 | -            | <i>stx2e</i> | - | - |
| ST267 | Pig                | Beijing      | 2012 | ONT      | H19 | -            | <i>stx2e</i> | - | - |
| ST268 | Pig                | Harbin       | 2012 | O100     | H30 | -            | <i>stx2</i>  | - | - |
| ST269 | Pig                | Harbin       | 2012 | O173     | H21 | -            | <i>stx2</i>  | - | - |
| ST270 | Pig                | Harbin       | 2012 | O2 (O50) | H30 | -            | <i>stx2</i>  | - | - |
| ST271 | Pig                | Harbin       | 2012 | O2 (O50) | H30 | -            | <i>stx2</i>  | - | - |
| ST272 | Pig                | Harbin       | 2012 | O2 (O50) | H30 | -            | <i>stx2</i>  | - | - |
| ST273 | Pig                | Harbin       | 2012 | O2 (O50) | H32 | -            | <i>stx2</i>  | - | - |
| ST274 | Pig                | Harbin       | 2012 | O2 (O50) | H32 | -            | <i>stx2</i>  | - | - |
| ST275 | Pig                | Harbin       | 2012 | O168     | H38 | -            | <i>stx2</i>  | - | - |
| ST276 | Beef cattle        | Harbin       | 2012 | ONT      | H30 | -            | <i>stx2g</i> | - | - |
| ST277 | Beef cattle        | Harbin       | 2012 | O71      | H30 | -            | <i>stx2</i>  | - | - |
| ST278 | Beef cattle        | Harbin       | 2012 | ONT      | H30 | -            | <i>stx2g</i> | - | - |
| ST280 | Beef cattle        | Harbin       | 2012 | ONT      | H30 | -            | <i>stx2g</i> | - | - |
| ST281 | Beef cattle        | Harbin       | 2012 | O22      | H8  | <i>stx1a</i> | <i>stx2d</i> | - | + |
| ST282 | Cow                | Heilongjiang | 2012 | O181     | H4  | -            | <i>stx2d</i> | - | - |
| ST283 | Cow                | Heilongjiang | 2012 | ONT      | H9  | -            | <i>stx2g</i> | - | - |
| ST284 | Cow                | Heilongjiang | 2012 | ONT      | H9  | -            | <i>stx2g</i> | - | - |
| ST285 | Cow                | Heilongjiang | 2012 | O81      | H31 | -            | <i>stx2d</i> | - | + |
| ST286 | Cow                | Heilongjiang | 2012 | O81      | H31 | -            | <i>stx2d</i> | - | + |
| ST287 | Beef cattle        | Heilongjiang | 2012 | O99      | H10 | -            | <i>stx2</i>  | - | - |
| ST288 | Cow                | Heilongjiang | 2012 | O81      | H31 | -            | <i>stx2d</i> | - | + |
| ST289 | Marmota himalayana | Qinghai      | 2012 | O112ab   | H8  | <i>stx1</i>  | -            | - | + |
| ST291 | Marmota himalayana | Qinghai      | 2012 | O5       | HNT | <i>stx1</i>  | -            | - | + |
| ST292 | Marmota himalayana | Qinghai      | 2012 | O5       | HNT | <i>stx1</i>  | -            | - | + |
| ST293 | Marmota himalayana | Qinghai      | 2013 | O53      | H18 | -            | <i>stx2</i>  | - | - |
| ST294 | Marmota himalayana | Qinghai      | 2013 | O53      | H18 | -            | <i>stx2</i>  | - | - |
| ST295 | Marmota himalayana | Qinghai      | 2013 | O53      | H18 | -            | <i>stx2</i>  | - | - |
| ST296 | Marmota himalayana | Qinghai      | 2013 | O71      | H8  | -            | <i>stx2a</i> | - | + |
| ST298 | Plateau Pika       | Qinghai      | 2013 | O74      | H8  | -            | <i>stx2d</i> | - | + |
| ST299 | Marmota himalayana | Qinghai      | 2013 | O53      | H18 | -            | <i>stx2</i>  | - | - |
| ST300 | Raw beef           | Sichuan      | 2013 | O96      | H19 | -            | <i>stx2a</i> | - | + |
| ST301 | pork               | Sichuan      | 2013 | O141     | H29 | -            | <i>stx2e</i> | - | - |

|       |                   |          |      |      |     |              |              |   |   |
|-------|-------------------|----------|------|------|-----|--------------|--------------|---|---|
| ST302 | Raw beef          | Sichuan  | 2013 | O22  | H16 | -            | <i>stx2b</i> | - | - |
| ST304 | Raw beef          | Beijing  | 2013 | O40  | H8  | -            | <i>stx2a</i> | - | + |
| ST305 | Raw beef          | Beijing  | 2013 | O40  | H8  | -            | <i>stx2a</i> | - | + |
| ST306 | Food              | Beijing  | 2013 | O8   | H9  | -            | <i>stx2e</i> | - | - |
| ST307 | Food              | Beijing  | 2013 | O8   | H9  | -            | <i>stx2e</i> | - | - |
| ST308 | Food              | Beijing  | 2013 | O8   | H9  | -            | <i>stx2e</i> | - | - |
| ST309 | Diarrheal patient | Sichuan  | 2013 | O48  | H21 | -            | <i>stx2e</i> | - | - |
| ST310 | Diarrheal patient | Shanghai | 2013 | O5   | HNT | <i>stx1</i>  | -            | + | + |
| ST311 | Diarrheal patient | Shanghai | 2013 | O68  | H10 | <i>stx1</i>  | -            | - | - |
| ST312 | Diarrheal patient | Shanghai | 2013 | O26  | H11 | <i>stx1</i>  | -            | + | + |
| ST313 | Raw beef          | Beijing  | 2013 | O100 | H19 | -            | <i>stx2e</i> | - | - |
| ST314 | Raw pork          | Beijing  | 2013 | O98  | H10 | -            | <i>stx2e</i> | - | - |
| ST315 | Raw pork          | Beijing  | 2013 | O98  | H30 | -            | <i>stx2e</i> | - | - |
| ST316 | Raw beef          | Beijing  | 2014 | O100 | H19 | -            | <i>stx2e</i> | - | - |
| ST317 | Raw mutton        | Beijing  | 2014 | ONT  | H21 | <i>stx1c</i> | -            | - | - |
| ST318 | Raw pork          | Beijing  | 2014 | O121 | H10 | -            | <i>stx2e</i> | - | - |
| ST319 | Raw mutton        | Beijing  | 2014 | O176 | H4  | <i>stx1c</i> | <i>stx2b</i> | - | + |
| ST320 | Raw mutton        | Beijing  | 2014 | O5   | H19 | <i>stx1c</i> | <i>stx2b</i> | - | - |
| ST321 | Raw mutton        | Beijing  | 2014 | O128 | H2  | <i>stx1c</i> | <i>stx2b</i> | - | + |
| ST322 | Raw chicken meat  | Beijing  | 2014 | O176 | H4  | <i>stx1c</i> | -            | - | + |
| ST323 | Raw duck meat     | Beijing  | 2014 | O176 | H4  | <i>stx1c</i> | -            | - | + |
| ST344 | Raw mutton        | Beijing  | 2014 | O8   | H30 | -            | <i>stx2e</i> | - | - |
| ST345 | Raw pork          | Beijing  | 2014 | O57  | H21 | -            | <i>stx2e</i> | - | - |
| ST346 | Raw pork          | Beijing  | 2014 | O8   | H19 | -            | <i>stx2e</i> | - | - |
| ST347 | Raw beef          | Beijing  | 2014 | O110 | H16 | <i>stx1c</i> | -            | - | - |
| ST348 | Raw beef          | Beijing  | 2014 | O103 | H25 | <i>stx1a</i> | -            | + | + |
| ST349 | Raw beef          | Beijing  | 2014 | O98  | H30 | -            | <i>stx2e</i> | - | - |
| ST350 | Raw beef          | Beijing  | 2014 | O103 | H25 | <i>stx1a</i> | -            | + | + |
| ST351 | Raw beef          | Beijing  | 2014 | O98  | H30 | -            | <i>stx2e</i> | - | - |
| ST352 | Raw mutton        | Beijing  | 2014 | O120 | H16 | <i>stx1c</i> | -            | - | - |
| ST353 | Raw beef          | Beijing  | 2014 | O128 | H2  | <i>stx1c</i> | <i>stx2b</i> | - | - |
| ST354 | Raw beef          | Beijing  | 2014 | O128 | H2  | <i>stx1c</i> | <i>stx2b</i> | - | - |
| ST355 | Raw beef          | Beijing  | 2014 | O128 | H2  | <i>stx1c</i> | <i>stx2b</i> | - | - |
| ST356 | Raw mutton        | Beijing  | 2014 | O161 | H19 | <i>stx1c</i> | -            | - | + |
| ST357 | Raw mutton        | Beijing  | 2014 | O176 | H4  | <i>stx1c</i> | -            | - | + |
| ST358 | Raw mutton        | Beijing  | 2014 | O104 | H7  | <i>stx1c</i> | -            | - | - |
| ST359 | Raw mutton        | Beijing  | 2014 | O128 | H2  | <i>stx1c</i> | <i>stx2b</i> | - | - |
| ST360 | Raw mutton        | Beijing  | 2014 | O176 | H4  | <i>stx1c</i> | -            | - | + |
| ST361 | Raw mutton        | Beijing  | 2014 | O21  | H25 | <i>stx1a</i> | -            | - | - |
| ST362 | Raw mutton        | Beijing  | 2014 | O91  | H14 | <i>stx1a</i> | <i>stx2b</i> | - | - |
| ST363 | Raw mutton        | Beijing  | 2014 | O104 | H7  | <i>stx1c</i> | -            | - | - |
| ST364 | Raw mutton        | Beijing  | 2014 | O128 | H2  | <i>stx1c</i> | <i>stx2b</i> | - | + |
| ST365 | Raw beef          | Beijing  | 2014 | O12  | HNT | -            | <i>stx2c</i> | + | + |

|       |                   |          |      |      |     |              |              |   |   |
|-------|-------------------|----------|------|------|-----|--------------|--------------|---|---|
| ST366 | Raw beef          | Beijing  | 2014 | O128 | H2  | <i>stx1c</i> | -            | - | - |
| ST367 | Raw mutton        | Beijing  | 2014 | O100 | H19 | -            | <i>stx2e</i> | - | - |
| ST368 | Raw mutton        | Beijing  | 2014 | O104 | H7  | <i>stx1c</i> | -            | - | - |
| ST369 | Raw mutton        | Beijing  | 2014 | O22  | H16 | -            | <i>stx2d</i> | - | + |
| ST370 | Raw mutton        | Sichuan  | 2014 | O113 | H7  | <i>stx1c</i> | -            | - | + |
| ST371 | Raw beef          | Sichuan  | 2014 | O84  | H20 | <i>stx1d</i> | -            | - | - |
| ST372 | Raw beef          | Sichuan  | 2014 | O76  | H21 | <i>stx1a</i> | -            | - | + |
| ST373 | Raw mutton        | Sichuan  | 2014 | O21  | H25 | <i>stx1a</i> | -            | - | - |
| ST374 | Raw beef          | Beijing  | 2014 | O8   | H30 | -            | <i>stx2a</i> | - | - |
| ST375 | Raw beef          | Beijing  | 2014 | O20  | H21 | -            | <i>stx2e</i> | - | - |
| ST376 | Raw mutton        | Beijing  | 2014 | O128 | H2  | <i>stx1c</i> | <i>stx2b</i> | - | + |
| ST377 | Raw mutton        | Beijing  | 2014 | O5   | H9  | <i>stx1a</i> | -            | + | + |
| ST378 | Raw beef          | Beijing  | 2014 | O116 | H21 | <i>stx1a</i> | <i>stx2a</i> | - | + |
| ST379 | Raw pork          | Beijing  | 2014 | O8   | H19 | -            | <i>stx2e</i> | - | - |
| ST380 | Pig               | Beijing  | 2014 | O141 | H29 | -            | <i>stx2e</i> | - | - |
| ST381 | Raw mutton        | Beijing  | 2014 | O120 | H30 | -            | <i>stx2e</i> | - | - |
| ST382 | Pig               | Beijing  | 2014 | O91  | H4  | -            | <i>stx2e</i> | - | - |
| ST383 | Pig               | Beijing  | 2014 | O172 | H30 | -            | <i>stx2e</i> | - | - |
| ST384 | Raw pork          | Beijing  | 2014 | O8   | H19 | -            | <i>stx2e</i> | - | - |
| ST385 | Raw pork          | Beijing  | 2014 | O91  | H4  | -            | <i>stx2e</i> | - | - |
| ST386 | Raw pork          | Beijing  | 2014 | O91  | H4  | -            | <i>stx2e</i> | - | - |
| ST387 | Raw pork          | Beijing  | 2014 | O91  | H4  | -            | <i>stx2e</i> | - | - |
| ST388 | Pig               | Guizhou  | 2012 | O159 | H16 | -            | <i>stx2e</i> | - | - |
| ST389 | Pig               | Guizhou  | 2012 | O100 | H20 | -            | <i>stx2e</i> | - | - |
| ST390 | Pig               | Guizhou  | 2012 | ONT  | H7  | -            | <i>stx2e</i> | - | - |
| ST391 | Pig               | Guizhou  | 2012 | O87  | H10 | -            | <i>stx2e</i> | - | - |
| ST392 | Pig               | Guizhou  | 2012 | O100 | H20 | -            | <i>stx2e</i> | - | + |
| ST393 | Pig               | Guizhou  | 2012 | ONT  | H7  | -            | <i>stx2e</i> | - | - |
| ST397 | Diarrheal patient | Henan    | 2013 | O130 | H8  | <i>stx1c</i> | -            | - | - |
| ST398 | Diarrheal patient | Henan    | 2013 | O130 | H8  | <i>stx1c</i> | -            | - | - |
| ST399 | Diarrheal patient | Henan    | 2013 | O130 | H8  | <i>stx1c</i> | -            | - | - |
| ST400 | Diarrheal patient | Henan    | 2013 | O130 | H8  | <i>stx1c</i> | -            | - | - |
| ST401 | Diarrheal patient | Henan    | 2013 | O130 | H8  | <i>stx1c</i> | -            | - | - |
| ST402 | Diarrheal patient | Henan    | 2013 | O117 | H8  | <i>stx1c</i> | -            | - | - |
| ST403 | Diarrheal patient | Henan    | 2013 | O117 | H8  | <i>stx1c</i> | -            | - | - |
| ST404 | Diarrheal patient | Henan    | 2013 | O130 | H8  | <i>stx1c</i> | -            | - | - |
| ST405 | Diarrheal patient | Henan    | 2013 | O117 | H8  | <i>stx1c</i> | -            | - | - |
| ST406 | Diarrheal patient | Shanghai | 2012 | O26  | H11 | <i>stx1a</i> | -            | + | + |
| ST407 | Diarrheal patient | Shanghai | 2013 | O5   | HNT | <i>stx1a</i> | -            | + | + |
| ST408 | Diarrheal patient | Shanghai | 2013 | O21  | H25 | <i>stx1a</i> | -            | - | - |
| ST409 | Diarrheal patient | Shanghai | 2013 | ONT  | H30 | -            | <i>stx2e</i> | - | - |
| ST410 | Diarrheal patient | Shanghai | 2013 | O149 | H10 | <i>stx1c</i> | -            | - | - |
| ST411 | Diarrheal patient | Shanghai | 2013 | O26  | H11 | <i>stx1a</i> | -            | + | + |

|       |                   |           |      |                |     |              |                 |   |   |
|-------|-------------------|-----------|------|----------------|-----|--------------|-----------------|---|---|
| ST412 | Diarrheal patient | Shanghai  | 2013 | O112ab         | H8  | <i>stx1a</i> | -               | - | - |
| ST413 | Diarrheal patient | Shanghai  | 2014 | O20            | H30 | -            | <i>stx2g</i>    | - | - |
| ST414 | Diarrheal patient | Shanghai  | 2014 | O104           | H7  | <i>stx1c</i> | -               | - | - |
| ST415 | Diarrheal patient | Shanghai  | 2014 | O84            | H2  | <i>stx1a</i> | -               | + | + |
| ST416 | Diarrheal patient | Shanghai  | 2014 | O26            | H11 | <i>stx1a</i> | -               | + | + |
| ST434 | Healthy carrier   | Guangdong | 2014 | O43            | H2  | -            | <i>stx2d</i>    | - | - |
| ST435 | Healthy carrier   | Qinghai   | 2013 | O91            | H14 | <i>stx1a</i> | <i>stx2b</i>    | - | + |
| ST437 | Diarrheal patient | Guangdong | 2010 | O111           | H8  | <i>stx1a</i> | -               | - | + |
| ST438 | Healthy carrier   | Guangdong | 2014 | ONT            | H21 | <i>stx1c</i> | -               | - | - |
| ST439 | Plateau Pika      | Qinghai   | 2015 | O169           | H8  | -            | <i>stx2b</i>    | - | + |
| ST440 | Plateau Pika      | Qinghai   | 2015 | O74            | H8  | -            | <i>2a+stx2d</i> | - | + |
| ST441 | Plateau Pika      | Qinghai   | 2015 | O49            | H21 | -            | <i>stx2b</i>    | - | - |
| ST442 | Plateau Pika      | Qinghai   | 2015 | O2             | H45 | <i>stx1a</i> | -               | - | - |
| ST443 | Plateau Pika      | Qinghai   | 2015 | O119           | H19 | <i>stx1a</i> | -               | - | + |
| ST444 | Plateau Pika      | Qinghai   | 2015 | O49            | H21 | -            | <i>stx2b</i>    | - | - |
| ST445 | Plateau Pika      | Qinghai   | 2015 | O81            | H21 | -            | <i>stx2a</i>    | - | + |
| ST446 | Plateau Pika      | Qinghai   | 2015 | O96            | H8  | -            | <i>stx2d</i>    | - | + |
| ST447 | Plateau Pika      | Qinghai   | 2015 | O2             | H45 | <i>stx1a</i> | -               | - | - |
| ST448 | Plateau Pika      | Qinghai   | 2015 | O120           | H9  | <i>stx1a</i> | <i>stx2d</i>    | - | + |
| ST449 | Plateau Pika      | Qinghai   | 2015 | O163           | 19  | -            | <i>stx2b</i>    | - | - |
| ST450 | Plateau Pika      | Qinghai   | 2015 | O159           | H21 | <i>stx1a</i> | <i>stx2d</i>    | - | + |
| ST451 | Plateau Pika      | Qinghai   | 2012 | O8             | H16 | -            | <i>stx2b</i>    | - | - |
| ST452 | Plateau Pika      | Qinghai   | 2012 | O8             | H2  | -            | <i>stx2d</i>    | - | + |
| ST453 | Plateau Pika      | Qinghai   | 2012 | O8             | H2  | -            | <i>stx2d</i>    | - | + |
| ST454 | Plateau Pika      | Qinghai   | 2012 | O8             | H2  | -            | <i>stx2d</i>    | - | + |
| ST455 | Plateau Pika      | Qinghai   | 2012 | O82            | H19 | <i>stx1a</i> | -               | - | + |
| ST456 | Plateau Pika      | Qinghai   | 2012 | O2             | H45 | <i>stx1a</i> | -               | - | - |
| ST457 | Plateau Pika      | Qinghai   | 2012 | O170           | H8  | -            | <i>stx2d</i>    | - | + |
| ST458 | Plateau Pika      | Qinghai   | 2012 | O74            | H8  | <i>stx1a</i> | <i>stx2d</i>    | - | + |
| ST459 | Plateau Pika      | Qinghai   | 2012 | O8             | H2  | -            | <i>stx2d</i>    | - | + |
| ST461 | Beef cattle       | Shandong  | 2015 | O177           | HNT | -            | <i>stx2c</i>    | + | + |
| ST463 | Pig               | Shandong  | 2015 | O77            | H30 | -            | <i>stx2e</i>    | - | - |
| ST464 | Pig               | Shandong  | 2015 | O77            | H30 | -            | <i>stx2e</i>    | - | - |
| ST465 | Pig               | Shandong  | 2015 | O86            | H32 | -            | <i>stx2e</i>    | - | - |
| ST466 | Pig               | Shandong  | 2015 | O44            | H30 | -            | <i>stx2e</i>    | - | - |
| ST467 | Pig               | Shandong  | 2015 | O110<br>(O113) | H30 | -            | <i>stx2e</i>    | - | - |
| ST468 | Pig               | Shandong  | 2015 | O20 O60        | H30 | -            | <i>stx2e</i>    | - | - |
| ST469 | Pig               | Shandong  | 2015 | O10            | H30 | -            | <i>stx2e</i>    | - | - |
| ST470 | Pig               | Shandong  | 2015 | O110           | HNT | -            | <i>stx2e</i>    | - | - |
| ST471 | Pig               | Shandong  | 2015 | O114           | H27 | -            | <i>stx2e</i>    | - | - |
| ST472 | Pig               | Shandong  | 2015 | O20            | H27 | -            | <i>stx2e</i>    | - | - |
| ST473 | Pig               | Shandong  | 2015 | O65            | H9  | -            | <i>stx2e</i>    | - | - |

|       |                   |           |      |      |     |              |              |   |   |
|-------|-------------------|-----------|------|------|-----|--------------|--------------|---|---|
| ST474 | Pig               | Shandong  | 2015 | O65  | H9  | -            | <i>stx2e</i> | - | - |
| ST475 | Pig               | Shandong  | 2015 | O8   | HNT | -            | <i>stx2e</i> | - | - |
| ST476 | Tibetan antelope  | Qinghai   | 2014 | O102 | H8  | <i>stx1a</i> | -            | - | - |
| ST477 | Tibetan antelope  | Qinghai   | 2014 | O50  | H14 | <i>stx1a</i> | -            | - | + |
| ST484 | Tibetan antelope  | Qinghai   | 2014 | O105 | H8  | -            | <i>stx2</i>  | - | + |
| ST485 | Tibetan antelope  | Qinghai   | 2014 | O74  | H8  | -            | <i>stx2</i>  | - | + |
| ST486 | Tibetan antelope  | Qinghai   | 2014 | O74  | H8  | -            | <i>stx2</i>  | - | + |
| ST506 | Diarrheal patient | Shandong  | 2014 | O3   | H4  | <i>stx1</i>  | -            | - | - |
| ST507 | Diarrheal patient | Shandong  | 2016 | O3   | H28 | <i>stx1</i>  | -            | - | - |
| ST508 | Diarrheal patient | Shanghai  | 2016 | O26  | H11 | <i>stx1</i>  | -            | + | + |
| ST509 | Healthy carrier   | Guangdong | 2016 | O8   | H19 | -            | <i>stx2</i>  | - | - |

**Table S2. Characteristics of 138 *ehxA*-positive non-O157 STEC strains used in this study**

| Strain  | Origin      | Location     | Year | O serogroup | H type | Hemolytic   | Virulence genes         |                         |            |             |             |             | Multiplex-inc/rep PCR |     |   |   |     | <i>ehxA</i> genotype | <i>ehxA</i> group |   |
|---------|-------------|--------------|------|-------------|--------|-------------|-------------------------|-------------------------|------------|-------------|-------------|-------------|-----------------------|-----|---|---|-----|----------------------|-------------------|---|
|         |             |              |      |             |        |             | <i>stx</i> <sub>1</sub> | <i>stx</i> <sub>2</sub> | <i>eae</i> | <i>toxB</i> | <i>katP</i> | <i>espP</i> | I1-Ir                 | FIB | F | K | B/O |                      |                   |   |
| STEC006 | Goat        | Henan        | 2009 | O45         | H2     | Non         | 1c                      | 2d                      | -          | -           | -           | -           | -                     | +   | - | + | -   | -                    | 1                 | I |
| STEC007 | Goat        | Henan        | 2009 | O91         | H14    | Narrow      | 1c                      | 2d                      | -          | -           | -           | +           | -                     | +   | + | - | -   | 2                    | I                 |   |
| STEC009 | Goat        | Henan        | 2009 | O91         | H14    | Transparent | 1c                      | 2d                      | -          | -           | -           | +           | -                     | +   | + | - | -   | 2                    | I                 |   |
| STEC011 | Goat        | Henan        | 2009 | O103        | H8     | Non         | 1c                      | -                       | -          | -           | -           | -           | -                     | +   | + | + | -   | 3                    | I                 |   |
| STEC015 | Goat        | Henan        | 2009 | O103        | H8     | Non         | 1c                      | -                       | -          | -           | -           | +           | -                     | +   | + | - | +   | 3                    | I                 |   |
| STEC016 | Goat        | Henan        | 2009 | O103        | H8     | Non         | 1c                      | -                       | -          | -           | -           | -           | -                     | +   | + | - | +   | 3                    | I                 |   |
| STEC017 | Goat        | Henan        | 2009 | O141ac      | H25    | Non         | -                       | 2g                      | -          | -           | -           | -           | -                     | +   | + | - | -   | 4                    | III               |   |
| STEC023 | Goat        | Henan        | 2009 | O103        | H8     | Narrow      | 1c                      | -                       | -          | -           | -           | -           | -                     | +   | + | - | +   | 3                    | I                 |   |
| STEC024 | Goat        | Henan        | 2009 | O103        | H8     | Transparent | 1c                      | -                       | -          | -           | -           | -           | -                     | +   | + | + | -   | 5                    | I                 |   |
| STEC025 | Goat        | Henan        | 2009 | O103        | H8     | Transparent | 1c                      | -                       | -          | -           | -           | -           | -                     | +   | + | + | -   | 3                    | I                 |   |
| STEC026 | Goat        | Henan        | 2009 | O103        | H8     | Narrow      | 1c                      | -                       | -          | -           | -           | -           | -                     | +   | + | - | +   | 3                    | I                 |   |
| STEC027 | Goat        | Henan        | 2009 | O103        | H8     | Narrow      | 1c                      | -                       | -          | -           | -           | -           | -                     | +   | + | - | +   | 3                    | I                 |   |
| STEC033 | Beef cattle | Heilongjiang | 2009 | O113        | H19    | Transparent | 1a                      | 2a                      | -          | -           | -           | +           | -                     | +   | + | - | -   | 6                    | I                 |   |
| STEC036 | Yak         | Qinghai      | 2012 | OONT        | H21    | Narrow      | -                       | 2d                      | -          | -           | -           | +           | -                     | +   | + | - | -   | 7                    | I                 |   |
| STEC037 | Yak         | Qinghai      | 2012 | OONT        | H44    | Transparent | 1a                      | -                       | -          | -           | -           | -           | -                     | +   | + | - | -   | 8                    | I                 |   |
| STEC038 | Yak         | Qinghai      | 2012 | O8          | H9     | Narrow      | 1a                      | 2d                      | -          | -           | -           | +           | -                     | +   | + | - | -   | 7                    | I                 |   |
| STEC039 | Yak         | Qinghai      | 2012 | OONT        | H7     | Transparent | 1a                      | -                       | -          | -           | -           | -           | -                     | +   | + | - | +   | 9                    | I                 |   |
| STEC040 | Yak         | Qinghai      | 2012 | O6          | H21    | Non         | 1a                      | -                       | -          | -           | -           | -           | -                     | +   | - | - | -   | 8                    | I                 |   |
| STEC042 | Yak         | Qinghai      | 2012 | O78         | H45    | Transparent | -                       | 2g                      | -          | -           | -           | -           | -                     | +   | + | - | -   | 8                    | I                 |   |

|         |     |         |      |      |     |             |    |       |   |   |   |   |   |   |   |   |   |    |   |
|---------|-----|---------|------|------|-----|-------------|----|-------|---|---|---|---|---|---|---|---|---|----|---|
| STEC043 | Yak | Qinghai | 2012 | O8   | H9  | Narrow      | 1a | 2d    | - | - | - | + | - | - | + | - | - | 7  | I |
| STEC045 | Yak | Qinghai | 2012 | O8   | H9  | Transparent | 1a | 2d    | - | - | - | + | - | + | + | - | - | 7  | I |
| STEC046 | Yak | Qinghai | 2012 | O6   | NT  | Non         | 1a | -     | - | - | - | - | - | + | + | - | - | 8  | I |
| STEC047 | Yak | Qinghai | 2012 | O165 | H21 | Non         | 1a | -     | - | - | - | - | - | + | + | - | - | 8  | I |
| STEC049 | Yak | Qinghai | 2012 | OONT | HNT | Narrow      | -  | 2c    | - | - | - | + | - | + | + | - | - | 7  | I |
| STEC050 | Yak | Qinghai | 2012 | O8   | H19 | Narrow      | 1a | -     | - | - | - | + | - | + | + | - | - | 10 | I |
| STEC051 | Yak | Qinghai | 2012 | ONT  | H21 | Transparent | 1a | -     | - | - | - | - | - | + | + | - | - | 3  | I |
| STEC052 | Yak | Qinghai | 2012 | ONT  | H21 | Transparent | 1a | -     | - | - | - | - | - | + | + | - | - | 8  | I |
| STEC053 | Yak | Qinghai | 2012 | ONT  | HNT | Narrow      | 1a | 2a+2b | - | - | - | + | - | + | + | + | - | 11 | I |
| STEC054 | Yak | Qinghai | 2012 | ONT  | H8  | Transparent | 1a | 2a+2b | - | - | - | + | - | + | + | + | - | 12 | I |
| STEC055 | Yak | Qinghai | 2012 | O66  | H8  | Transparent | 1a | -     | - | - | - | + | - | - | + | - | - | 13 | I |
| STEC056 | Yak | Qinghai | 2012 | O78  | HNT | Narrow      | -  | 2a    | + | - | - | + | - | + | - | + | - | 6  | I |
| STEC057 | Yak | Qinghai | 2012 | O78  | H21 | Transparent | -  | 2c    | - | - | - | + | - | + | + | - | - | 7  | I |
| STEC063 | Yak | Qinghai | 2012 | O8   | H19 | Transparent | 1a | -     | - | - | - | + | - | + | + | - | - | 10 | I |
| STEC064 | Yak | Qinghai | 2012 | O8   | H19 | Transparent | 1a | -     | - | - | - | + | - | + | + | - | - | 10 | I |
| STEC065 | Yak | Qinghai | 2012 | O8   | H9  | Narrow      | 1a | 2d    | - | - | - | + | - | + | + | - | - | 7  | I |
| STEC066 | Yak | Qinghai | 2012 | O8   | H9  | Narrow      | 1a | 2d    | - | - | - | + | - | + | + | - | - | 7  | I |
| STEC068 | Yak | Qinghai | 2012 | O78  | H21 | Narrow      | -  | 2a    | + | - | - | + | - | + | - | + | - | 6  | I |
| STEC071 | Yak | Qinghai | 2012 | O8   | H9  | Transparent | 1a | 2d    | - | - | - | + | - | + | + | - | - | 7  | I |
| STEC072 | Yak | Qinghai | 2012 | O8   | H9  | Narrow      | 1a | 2d    | - | - | - | + | - | + | + | - | - | 7  | I |
| STEC073 | Yak | Qinghai | 2012 | O8   | H9  | Narrow      | 1a | 2d    | - | - | - | + | - | + | + | - | - | 7  | I |
| STEC075 | Yak | Qinghai | 2012 | O66  | H21 | Non         | -  | 2a+2b | - | - | - | + | - | + | + | + | - | 6  | I |
| STEC076 | Yak | Qinghai | 2012 | ONT  | H8  | Narrow      | -  | 2b    | - | - | - | - | - | + | + | - | - | 14 | I |
| STEC077 | Yak | Qinghai | 2012 | O158 | H8  | Narrow      | -  | 2b    | - | - | - | - | - | + | + | - | - | 14 | I |
| STEC078 | Yak | Qinghai | 2012 | O158 | H8  | Narrow      | -  | 2b    | - | - | - | - | - | + | + | - | - | 15 | I |

|         |     |         |      |      |     |             |    |       |   |   |   |   |   |   |   |   |   |   |    |   |
|---------|-----|---------|------|------|-----|-------------|----|-------|---|---|---|---|---|---|---|---|---|---|----|---|
| STEC081 | Yak | Qinghai | 2012 | O78  | H8  | Transparent | -  | 2a    | - | - | - | - | - | - | - | - | - | - | 16 | I |
| STEC082 | Yak | Qinghai | 2012 | O78  | H8  | Transparent | -  | 2a    | - | - | - | - | - | + | - | - | - | - | 16 | I |
| STEC084 | Yak | Qinghai | 2012 | O66  | H21 | Non         | -  | 2a+2b | - | - | - | + | - | + | + | + | - | - | 6  | I |
| STEC089 | Yak | Qinghai | 2012 | ONT  | H21 | Non         | 1a | -     | - | - | - | - | - | + | + | - | - | - | 17 | I |
| STEC091 | Yak | Qinghai | 2012 | ONT  | H21 | Transparent | 1a | -     | - | - | - | - | - | + | + | - | - | - | 8  | I |
| STEC092 | Yak | Qinghai | 2012 | ONT  | H8  | Transparent | -  | 2b    | - | - | - | - | - | + | + | - | - | - | 14 | I |
| STEC094 | Yak | Qinghai | 2012 | O137 | H21 | Narrow      | 1a | 2a    | - | - | - | - | - | + | - | - | + | - | 9  | I |
| STEC095 | Yak | Qinghai | 2012 | ONT  | H8  | Transparent | 1a | -     | - | - | - | - | - | + | + | - | - | - | 16 | I |
| STEC096 | Yak | Qinghai | 2012 | O127 | H8  | Non         | 1a | 2d    | - | - | - | + | - | + | + | - | - | - | 13 | I |
| STEC100 | Yak | Qinghai | 2012 | ONT  | H8  | Transparent | 1a | 2b    | - | - | - | + | - | + | + | - | - | - | 6  | I |
| STEC101 | Yak | Qinghai | 2012 | O8   | H2  | Transparent | -  | 2d    | - | - | - | - | + | + | + | + | - | + | 14 | I |
| STEC102 | Yak | Qinghai | 2012 | O165 | H8  | Transparent | 1a | -     | - | - | - | + | - | - | + | - | - | - | 13 | I |
| STEC103 | Yak | Qinghai | 2012 | O165 | H8  | Non         | 1a | -     | - | - | - | + | - | + | + | - | - | - | 13 | I |
| STEC115 | Yak | Qinghai | 2012 | O6   | H14 | Transparent | -  | 2b    | - | - | - | + | - | + | + | + | - | - | 6  | I |
| STEC116 | Yak | Qinghai | 2012 | O6   | H14 | Transparent | -  | 2b    | - | - | - | + | - | + | + | - | - | - | 34 | I |
| STEC119 | Yak | Qinghai | 2012 | ONT  | H8  | Narrow      | 1a | 2d    | - | - | - | + | - | + | + | - | + | - | 12 | I |
| STEC120 | Yak | Qinghai | 2012 | O165 | H8  | Transparent | 1a | 2d    | - | - | - | + | - | + | - | + | - | - | 12 | I |
| STEC127 | Yak | Qinghai | 2012 | O78  | H8  | Transparent | 1a | 2d    | - | - | - | - | - | - | + | - | - | - | 16 | I |
| STEC128 | Yak | Qinghai | 2012 | O78  | H8  | Narrow      | 1a | 2d    | - | - | - | - | - | + | - | - | - | - | 16 | I |
| STEC129 | Yak | Qinghai | 2012 | ONT  | H21 | Non         | 1a | 2d    | - | - | - | - | - | + | - | - | + | - | 9  | I |
| STEC130 | Yak | Qinghai | 2012 | ONT  | H21 | Non         | 1a | 2d    | - | - | - | - | - | + | + | - | - | - | 9  | I |
| STEC131 | Yak | Qinghai | 2012 | ONT  | H44 | Transparent | 1a | -     | - | - | - | + | - | + | + | - | - | - | 13 | I |
| STEC132 | Yak | Qinghai | 2012 | O123 | H8  | Transparent | 1a | 2b    | - | - | - | + | - | + | + | - | - | - | 6  | I |
| STEC138 | Yak | Qinghai | 2012 | O149 | H45 | Non         | -  | 2d    | - | - | - | - | - | + | + | - | - | - | 16 | I |
| STEC139 | Yak | Qinghai | 2012 | O149 | H45 | Non         | -  | 2d    | - | - | - | - | - | - | + | - | - | - | 16 | I |



|         |                    |              |      |        |     |             |    |       |   |   |   |   |   |   |   |   |   |    |    |
|---------|--------------------|--------------|------|--------|-----|-------------|----|-------|---|---|---|---|---|---|---|---|---|----|----|
| STEC140 | Yak                | Qinghai      | 2012 | ONT    | H8  | Narrow      | -  | 2a    | - | - | - | - | - | + | + | - | - | 36 | I  |
| STEC141 | Yak                | Qinghai      | 2012 | ONT    | H8  | Narrow      | -  | 2a    | - | - | - | - | - | + | + | - | - | 14 | I  |
| STEC144 | Yak                | Qinghai      | 2012 | O78    | H45 | Non         | -  | 2a+2c | - | - | - | + | - | + | + | - | - | 7  | I  |
| STEC145 | Yak                | Qinghai      | 2012 | O78    | H21 | Non         | -  | 2a+2c | - | - | - | + | - | + | + | - | - | 7  | I  |
| STEC146 | Yak                | Qinghai      | 2012 | O2     | H21 | Non         | -  | 2a+2c | - | - | - | + | - | + | + | - | - | 7  | I  |
| STEC152 | Yak                | Qinghai      | 2012 | O78    | H8  | Transparent | -  | 2a    | - | - | - | - | - | + | - | - | - | 16 | I  |
| STEC153 | Yak                | Qinghai      | 2012 | O78    | H8  | Narrow      | -  | 2a    | - | - | - | - | - | + | - | - | - | 16 | I  |
| STEC155 | Yak                | Qinghai      | 2012 | O12    | H12 | Non         | 1a | -     | - | - | - | + | - | - | + | - | + | 18 | I  |
| STEC156 | Yak                | Qinghai      | 2012 | O78    | H8  | Transparent | -  | 2a    | - | - | - | - | - | + | - | - | - | 16 | I  |
| STEC158 | Yak                | Qinghai      | 2012 | O78    | H8  | Transparent | -  | 2a+2c | - | - | - | + | - | + | + | + | - | 19 | I  |
| STEC281 | Beef cattle        | Harbin       | 2012 | O22    | H8  | Transparent | 1a | 2d    | - | - | - | + | - | + | + | - | - | 20 | I  |
| STEC285 | Cow                | Heilongjiang | 2012 | O81    | H31 | Narrow      | -  | 2d    | - | - | - | + | - | + | + | - | - | 6  | I  |
| STEC286 | Cow                | Heilongjiang | 2012 | O81    | H31 | Transparent | -  | 2d    | - | - | - | + | - | + | + | - | - | 6  | I  |
| STEC288 | Cow                | Heilongjiang | 2012 | O81    | H31 | Transparent | -  | 2d    | - | - | - | - | - | + | + | - | - | 6  | I  |
| STEC289 | Marmota himalayana | Qinghai      | 2012 | O112ab | H8  | Transparent | 1  | -     | - | - | - | + | - | + | + | - | - | 21 | I  |
| STEC291 | Marmota himalayana | Qinghai      | 2012 | O5     | HNT | Transparent | 1  | -     | - | - | - | + | - | + | + | - | - | 22 | II |
| STEC292 | Marmota himalayana | Qinghai      | 2012 | O5     | HNT | Narrow      | 1  | -     | - | - | - | + | - | + | + | - | - | 22 | II |
| STEC296 | Marmota himalayana | Qinghai      | 2013 | O71    | H8  | Transparent | -  | 2a    | - | - | - | + | - | + | + | - | - | 8  | I  |
| STEC298 | Plateau Pika       | Qinghai      | 2013 | O74    | H8  | Non         | -  | 2d    | - | - | - | + | - | + | + | + | - | 23 | I  |
| STEC300 | Raw beef           | Sichuan      | 2013 | O96    | H19 | Non         | -  | 2a    | - | - | - | - | - | - | - | - | - | 24 | I  |
| STEC304 | Raw beef           | Beijing      | 2013 | O40    | H8  | Non         | -  | 2a    | - | - | - | + | - | + | + | - | - | 13 | I  |
| STEC305 | Raw beef           | Beijing      | 2013 | O40    | H8  | Non         | -  | 2a    | - | - | - | + | - | + | + | - | + | 13 | I  |
| STEC310 | Diarrheal patient  | Shanghai     | 2013 | O5     | HNT | Non         | 1  | -     | + | - | - | + | - | + | - | - | - | 22 | II |
| STEC312 | Diarrheal patient  | Shanghai     | 2013 | O26    | H11 | Non         | 1  | -     | + | + | + | + | - | + | - | - | + | 25 | II |
| STEC319 | Raw mutton         | Beijing      | 2014 | O176   | H4  | Transparent | 1c | 2b    | - | - | - | - | - | + | + | - | - | 3  | I  |

|         |                   |           |      |      |     |             |    |    |   |   |   |   |   |   |   |   |   |    |    |
|---------|-------------------|-----------|------|------|-----|-------------|----|----|---|---|---|---|---|---|---|---|---|----|----|
| STEC321 | Raw mutton        | Beijing   | 2014 | O128 | H2  | Non         | 1c | 2b | - | - | - | - | - | + | + | - | + | 3  | I  |
| STEC322 | Raw chicken meat  | Beijing   | 2014 | O176 | H4  | Narrow      | 1c | -  | - | - | - | - | - | + | + | + | - | 3  | I  |
| STEC323 | Raw duck meat     | Beijing   | 2014 | O176 | H4  | Non         | 1c | -  | - | - | - | - | - | + | + | - | - | 3  | I  |
| STEC348 | Raw beef          | Beijing   | 2014 | O103 | H25 | Narrow      | 1a | -  | + | - | - | - | - | + | - | - | - | 25 | II |
| STEC350 | Raw beef          | Beijing   | 2014 | O103 | H25 | Narrow      | 1a | -  | + | - | - | - | - | + | - | - | - | 26 | II |
| STEC356 | Raw mutton        | Beijing   | 2014 | O161 | H19 | Transparent | 1c | -  | - | - | - | - | - | - | - | - | - | 35 | I  |
| STEC357 | Raw mutton        | Beijing   | 2014 | O176 | H4  | Non         | 1c | -  | - | - | - | - | - | + | - | - | - | 3  | I  |
| STEC360 | Raw mutton        | Beijing   | 2014 | O176 | H4  | Non         | 1c | -  | - | - | - | - | - | - | + | - | - | 27 | I  |
| STEC364 | Raw mutton        | Beijing   | 2014 | O128 | H2  | Non         | 1c | 2b | - | - | - | - | - | + | + | - | + | 3  | I  |
| STEC365 | Raw beef          | Beijing   | 2014 | O12  | HNT | Transparent | -  | 2c | + | - | + | + | - | + | + | - | - | 28 | II |
| STEC369 | Raw mutton        | Beijing   | 2014 | O22  | H16 | Transparent | -  | 2d | - | - | - | + | - | + | + | - | - | 20 | I  |
| STEC370 | Raw mutton        | Sichuan   | 2014 | O113 | H7  | Transparent | 1c | -  | - | - | - | - | - | + | + | - | - | 29 | I  |
| STEC372 | Raw beef          | Sichuan   | 2014 | O76  | H21 | Non         | 1a | -  | - | - | - | + | - | - | - | + | - | 30 | I  |
| STEC376 | Raw mutton        | Beijing   | 2014 | O128 | H2  | Non         | 1c | 2b | - | - | - | - | - | + | - | + | - | 3  | I  |
| STEC377 | Raw mutton        | Beijing   | 2014 | O5   | H9  | Non         | 1a | -  | + | - | - | + | - | + | + | - | - | 22 | II |
| STEC378 | Raw beef          | Beijing   | 2014 | O116 | H21 | Transparent | 1a | 2a | - | - | - | + | - | + | - | + | - | 31 | I  |
| STEC392 | Pig               | Guizhou   | 2012 | O100 | H20 | Non         | -  | 2e | - | - | - | - | - | + | + | + | - | 3  | I  |
| STEC406 | Diarrheal patient | Shanghai  | 2012 | O26  | H11 | Transparent | 1a | -  | + | + | + | + | - | + | - | - | + | 25 | II |
| STEC407 | Diarrheal patient | Shanghai  | 2013 | O5   | HNT | Non         | 1a | -  | + | - | - | + | - | + | - | - | - | 22 | II |
| STEC411 | Diarrheal patient | Shanghai  | 2013 | O26  | H11 | Non         | 1a | -  | + | + | + | + | - | + | - | - | + | 25 | II |
| STEC415 | Diarrheal patient | Shanghai  | 2014 | O84  | H2  | Narrow      | 1a | -  | + | - | - | - | - | + | + | - | - | 32 | II |
| STEC416 | Diarrheal patient | Shanghai  | 2014 | O26  | H11 | Transparent | 1a | -  | + | + | + | + | - | + | - | - | + | 25 | II |
| STEC435 | Healthy carrier   | Qinghai   | 2013 | O91  | H14 | Narrow      | 1a | 2b | - | - | - | - | - | + | + | - | - | 3  | I  |
| STEC437 | Diarrheal patient | Guangdong | 2010 | O111 | H8  | Transparent | 1a | -  | - | - | + | - | - | + | + | - | + | 33 | II |
| STEC439 | Plateau Pika      | Qinghai   | 2015 | O169 | H8  | Transparent | -  | 2b | - | - | - | - | - | + | + | - | - | 14 | I  |

|         |                   |          |      |      |     |             |    |       |   |   |   |   |   |   |   |   |   |    |    |
|---------|-------------------|----------|------|------|-----|-------------|----|-------|---|---|---|---|---|---|---|---|---|----|----|
| STEC440 | Plateau Pika      | Qinghai  | 2015 | O74  | H8  | Narrow      | -  | 2a+2d | - | - | - | + | - | + | + | + | - | 23 | I  |
| STEC443 | Plateau Pika      | Qinghai  | 2015 | O119 | H19 | Non         | 1a | -     | - | - | - | + | - | - | + | - | + | 10 | I  |
| STEC445 | Plateau Pika      | Qinghai  | 2015 | O81  | H21 | Non         | -  | 2a    | - | - | - | + | - | + | - | + | - | 12 | I  |
| STEC446 | Plateau Pika      | Qinghai  | 2015 | O96  | H8  | Transparent | -  | 2d    | - | - | - | - | - | + | + | - | - | 14 | I  |
| STEC448 | Plateau Pika      | Qinghai  | 2015 | O120 | H9  | Transparent | 1a | 2d    | - | - | - | + | - | + | + | - | - | 7  | I  |
| STEC450 | Plateau Pika      | Qinghai  | 2015 | O159 | H21 | Transparent | 1a | 2d    | - | - | - | + | - | - | - | - | - | 9  | I  |
| STEC452 | Plateau Pika      | Qinghai  | 2012 | O8   | H2  | Narrow      | -  | 2d    | - | - | - | - | - | + | + | - | - | 14 | I  |
| STEC453 | Plateau Pika      | Qinghai  | 2012 | O8   | H2  | Narrow      | -  | 2d    | - | - | - | - | - | + | + | - | - | 14 | I  |
| STEC454 | Plateau Pika      | Qinghai  | 2012 | O8   | H2  | Narrow      | -  | 2d    | - | - | - | - | - | + | + | - | - | 14 | I  |
| STEC455 | Plateau Pika      | Qinghai  | 2012 | O82  | H19 | Transparent | 1a | -     | - | - | - | + | - | + | + | - | + | 10 | I  |
| STEC457 | Plateau Pika      | Qinghai  | 2012 | O170 | H8  | Transparent | -  | 2d    | - | - | - | - | - | + | + | - | - | 14 | I  |
| STEC458 | Plateau Pika      | Qinghai  | 2012 | O74  | H8  | Narrow      | 1a | 2d    | - | - | - | - | - | + | - | - | - | 16 | I  |
| STEC459 | Plateau Pika      | Qinghai  | 2012 | O8   | H2  | Non         | -  | 2d    | - | - | - | - | - | + | + | - | - | 14 | I  |
| STEC461 | Beef cattle       | Shandong | 2015 | O177 | HNT | Non         | -  | 2c    | + | - | + | + | - | + | + | - | - | 28 | II |
| STEC477 | Tibetan antelope  | Qinghai  | 2014 | O50  | H14 | Non         | 1a | -     | - | - | - | + | - | + | + | - | - | 2  | I  |
| STEC484 | Tibetan antelope  | Qinghai  | 2014 | O105 | H8  | Non         | -  | 2     | - | - | - | - | - | + | + | + | - | 14 | I  |
| STEC485 | Tibetan antelope  | Qinghai  | 2014 | O74  | H8  | Transparent | -  | 2     | - | - | - | + | - | - | + | + | - | 23 | I  |
| STEC486 | Tibetan antelope  | Qinghai  | 2014 | O74  | H8  | Narrow      | -  | 2     | - | - | - | + | - | - | + | + | - | 23 | I  |
| STEC508 | Diarrheal patient | Shanghai | 2016 | O26  | H11 | Non         | 1  | -     | + | + | + | + | - | + | - | - | - | 25 | II |
